# Supplementary material for: Detection of Replication Competent Lentivirus Using a qPCR Assay for VSV-G
Source: PubMed Central journal article supplement (PMC5633339; doi:10.1016/j.omtm.2017.09.001), 2017-09-21
Supplement: mmc1.pdf [file mmc1.pdf]

**OMTM, Volume 8**

## **Supplemental Information**

### **Detection of Replication Competent Lentivirus**

#### **Using a qPCR Assay for VSV-G**

**Lindsey M. Skrdlant, Randall J. Armstrong, Brett M. Keidaisch, Mario F. Lorente, and David L. DiGiusto**

Supplemental Table 1. Limit of Detection in Water vs. DNA

|           | Water Diluent | DNA diluent |
|-----------|---------------|-------------|
| 10 copies | 100.00%       | 83.33%      |
| 8 copies  | 83.33%        | 75.00%      |
| 6 copies  | 83.33%        | 66.67%      |
| 5 copies  | 76.19%        | 61.90%      |
| 4 copies  | 66.67%        | 58.33%      |
| 3 copies  | 66.67%        | 33.33%      |
| NTC       | 0.00%         | 0.00%       |

**Supplemental Table 1. Limit of Detection for VSV-G in nuclease-free water and control human DNA.** Percentage of wells that had detectable VSV-G within 40 cycles for 10, 8, 6, 5, 4, and 3 copies/reaction and no template control (NTC).

Supplemental Table 2. LOD in DNA + 3% DMSO

|           | Water Diluent | DNA diluent | DNA diluent + 3% DMSO |
|-----------|---------------|-------------|-----------------------|
| 10 copies | 100.00%       | 83.33%      | 97.92%                |
| 8 copies  | 83.33%        | 75.00%      | 83.33%                |
| 6 copies  | 83.33%        | 66.67%      | 79.17%                |
| 5 copies  | 76.19%        | 61.90%      | 68.75%                |
| 4 copies  | 66.67%        | 58.33%      | 68.75%                |
| 3 copies  | 66.67%        | 33.33%      | 52.08%                |
| NTC       | 0.00%         | 0.00%       | 2.08%                 |

**Supplemental Table 2. Limit of Detection for VSV-G in nuclease-free water, control human DNA, and control human DNA with a final 3% (v/v) DMSO reaction concentration.**

Percentage of wells that had detectable VSV-G in a DNA diluent with 3% DMSO within 40 cycles for 10, 8, 6, 5, 4, and 3 copies/reaction and no template control (NTC). Data for nuclease-free water and control human DNA was repeated from Supplemental Table 1 for comparison.
